# Supplementary material
Source: PubMed Central journal article supplement (PMC3975674)
Supplement: NIHMS549102-supplement-1_si_001.pdf [file NIHMS549102-supplement-1_si_001.pdf]

**Supplemental Material** for “Metabolomics Analysis Identifies D-Alanine-D-alanine Ligase as the Primary Lethal Target of D-cycloserine in Mycobacteria” by Steven Halouska, Robert J. Fenton, Denise K. Zinniel, Darrell D. Marshall, Raul G. Barletta, Robert Powers

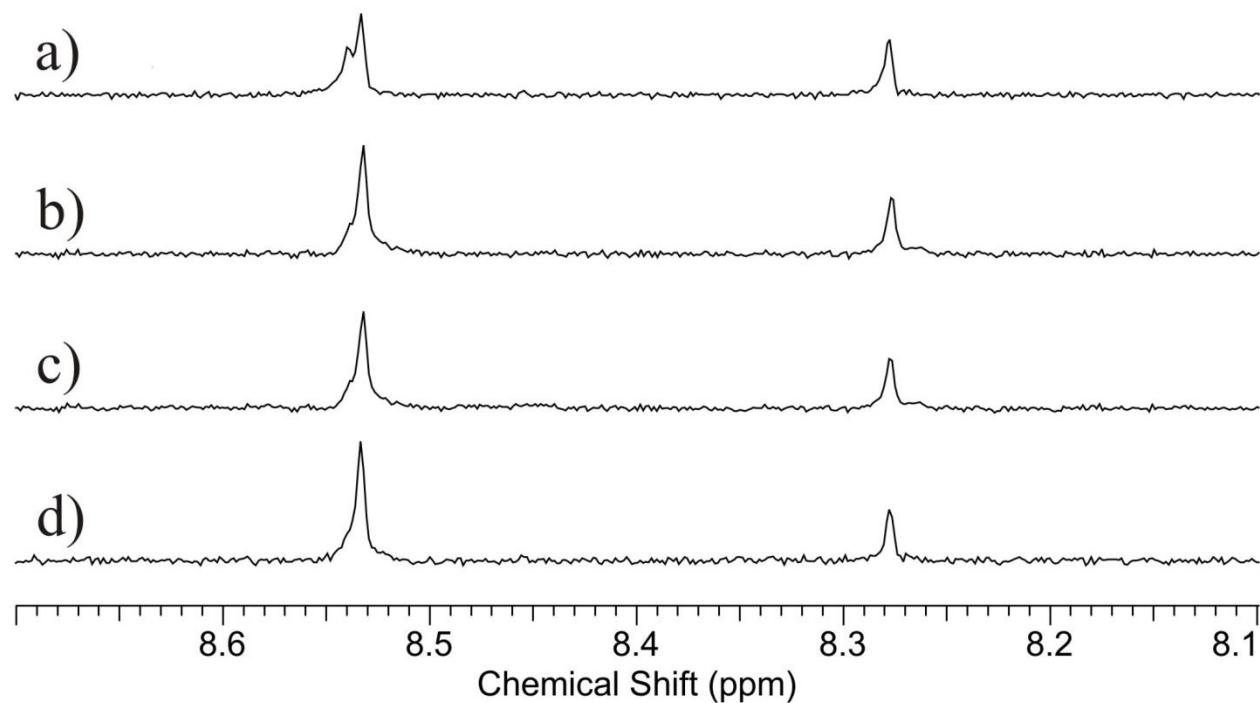

**Figure 1S:** Ligand binding assays comparing the intensities of the ATP peaks (8.28 and 8.54ppm) in mixtures consisting of: a) 100  $\mu$ M ATP, D-alanine, DCS and 25  $\mu$ M Ddl; b) 100  $\mu$ M ATP and D-alanine and 25  $\mu$ M Ddl; c) 100  $\mu$ M ATP and 25  $\mu$ M Ddl; and d) 100  $\mu$ M ATP as a control.

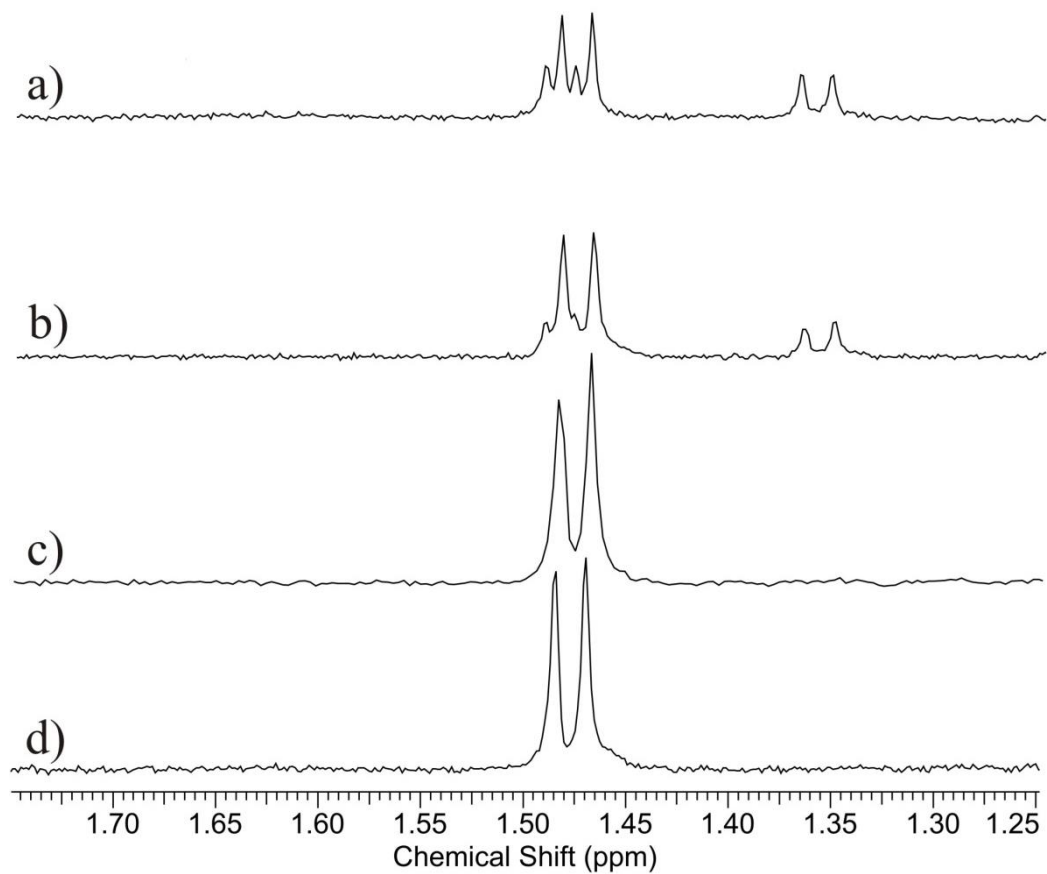

**Figure 2S:** Ligand binding assays comparing the intensities of the D-alanine peaks (1.45-1.50) in mixtures consisting of: a) 100  $\mu$ M ATP, D-alanine, DCS and 25  $\mu$ M Ddl; b) 100  $\mu$ M ATP and D-alanine and 25  $\mu$ M Ddl; c) 100  $\mu$ M D-alanine and 25  $\mu$ M Ddl; and d) 100  $\mu$ M D-alanine as a control. Formation of D-alanyl-D-alanine (1.33-1.38ppm) is formed when ATP, D-alanine, and Ddl are in the same mixture.

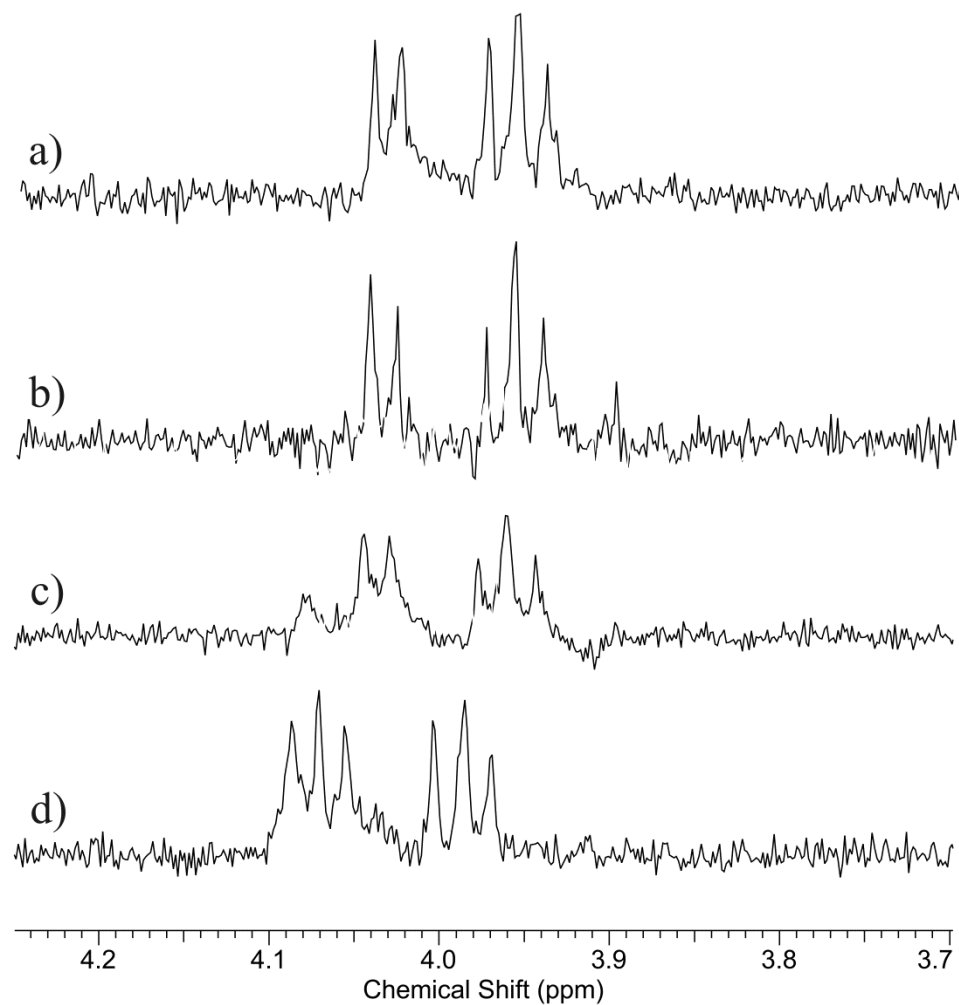

**Figure 3S:** Ligand binding assays comparing the intensities of the DCS peaks (3.95-4.10 ppm) in mixtures consisting of: a) 100  $\mu$ M ATP, D-alanine, DCS and 25  $\mu$ M Ddl; b) 100  $\mu$ M ATP, DCS and 25  $\mu$ M Ddl; c) 100  $\mu$ M DCS and 25  $\mu$ M Ddl; and d) 100  $\mu$ M DCS as a control.

a)

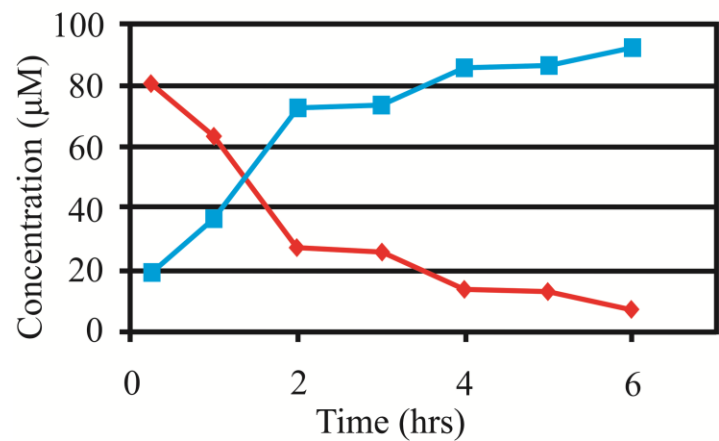

b)

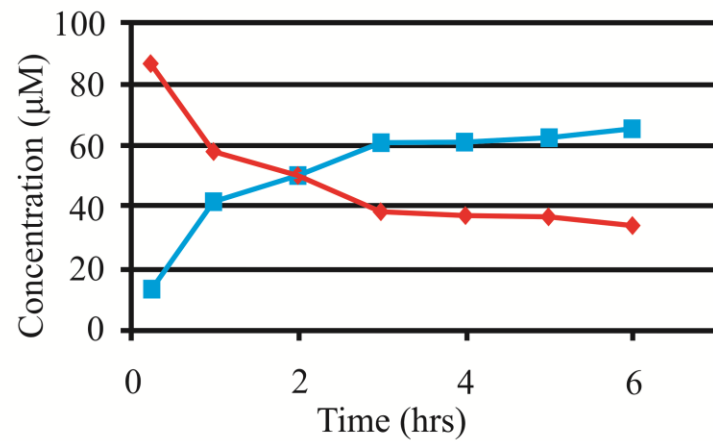

**Figure 4S:** 1D  $^1\text{H}$  NMR was used to monitor the conversion of (a) ATP (blue) to ADP (red) and (b) D-alanine (red) to D-alanyl-D-alanine (blue) by Ddl. The initial concentrations were fixed at Ddl (25  $\mu\text{M}$ ) D-alanine (100  $\mu\text{M}$ ) and ATP (100  $\mu\text{M}$ ).
